# Supplementary material for: Recognition of specific monosaccharides by fluorescence change through the suppression effect on excited-state intermolecular proton transfer reactions
Source: Royal Society of Chemistry journal article supplement (doi:10.1039/d4tb01745e), 2024-01-01
Supplement: d4tb01745e1.pdf [file d4tb01745e1.pdf]

## Supplementary material

# Recognition of specific monosaccharides by fluorescence change through the suppression on Excited State Intermolecular Proton Transfer reactions

*Leyun Huang, and Yoshinobu Nishimura\**

Graduate School of Pure and Applied Sciences, University of Tsukuba, 1-1-1

Tennoudai, Tsukuba, Ibaraki 305-8571, Japan

\*Corresponding author e-mail: [nishimura@chem.tsukuba.ac.jp](mailto:nishimura@chem.tsukuba.ac.jp) (Yoshinobu Nishimura)

|                                                                                                                                |    |
|--------------------------------------------------------------------------------------------------------------------------------|----|
| <b>1. Experimentals</b> .....                                                                                                  | 2  |
| <b>2. Absorption spectra of <i>m</i>-CF<sub>3</sub>-1PUP in DMF in the presence of TBAAc</b> .....                             | 3  |
| <b>3. Fluorescence spectra of <i>m</i>-CF<sub>3</sub>-1PUP in DMF in the presence of TBAAc</b> .....                           | 4  |
| <b>4. Fluorescence spectra of <i>m</i>-CF<sub>3</sub>-1PUP in DMF in the presence of hydroxy compounds without TBAAc</b> ..... | 5  |
| <b>5. Fluorescence decay curves of <i>m</i>-CF<sub>3</sub>-1PUP in DMF in the presence of TBAAc</b> .....                      | 8  |
| <b>6. Fluorescence lifetimes of <i>m</i>-CF<sub>3</sub>-1PUP in DMF in the presence of TBAAc</b> .....                         | 9  |
| <b>7. Absorption spectra of <i>m</i>-CF<sub>3</sub>-1PUP in DMF in the presence of hydroxy compounds</b> .....                 | 10 |
| <b>8. Fluorescence lifetimes of <i>m</i>-CF<sub>3</sub>-1PUP in DMF in the presence of hydroxy compounds</b> ...               | 13 |
| <b>9. References</b> .....                                                                                                     | 17 |

## 1. Experimentals

1-aminopyrene (80.7 mg, 0.37 mmol) and 3- (Trifluoromethyl) phenyl isocyanate (105  $\mu$ L, 0.74 mmol) were stirred in dry tetrahydrofuran (THF; 6 mL) at 80  $^{\circ}$ C under  $N_2$  for 24 h. The pure desired product was obtained by recrystallization of the residue from ethanol to produce a white needle-like solid (22.9 mg, 15.3%).  $^1H$  NMR (DMSO- $d_6$ , 400 MHz):  $\delta$  7.35 (d,  $J$  = 7.4 Hz, 1H), 7.56 (d,  $J$  = 7.8 Hz, 1H), 7.65 (d,  $J$  = 8.3 Hz, 1H), 8.05 (d,  $J$  = 7.6 Hz, 1H), 8.15 (d,  $J$  = 8.8 Hz, 1H), 8.27 (d,  $J$  = 9.1 Hz, 1H), 8.27-8.30 (m, 3H), 8.33 (d,  $J$  = 9.3 Hz, 1H), 8.54 (d,  $J$  = 8.4 Hz, 1H), 9.26 (s, 1H), 9.46 (s, 1H). Anal. Calcd for  $C_{24}H_{15}F_3N_2O$ : C, 71.28; H, 3.74; N, 6.93; found: C, 70.95; H, 3.57; N, 6.93.

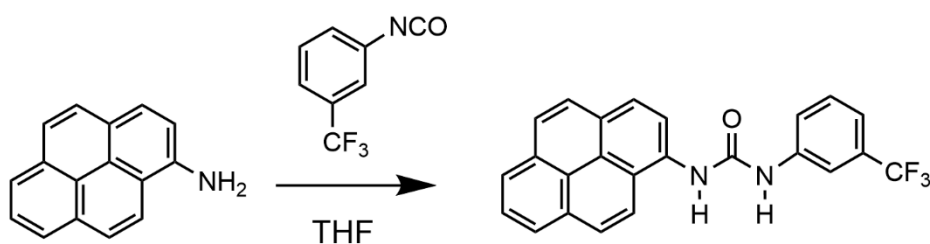

**Fig. S1.** The synthetic route of *m*-CF<sub>3</sub>-1PUP.<sup>1</sup>

## 2. Absorption spectra of *m*-CF<sub>3</sub>-1PUP in DMF in the presence of TBAAc

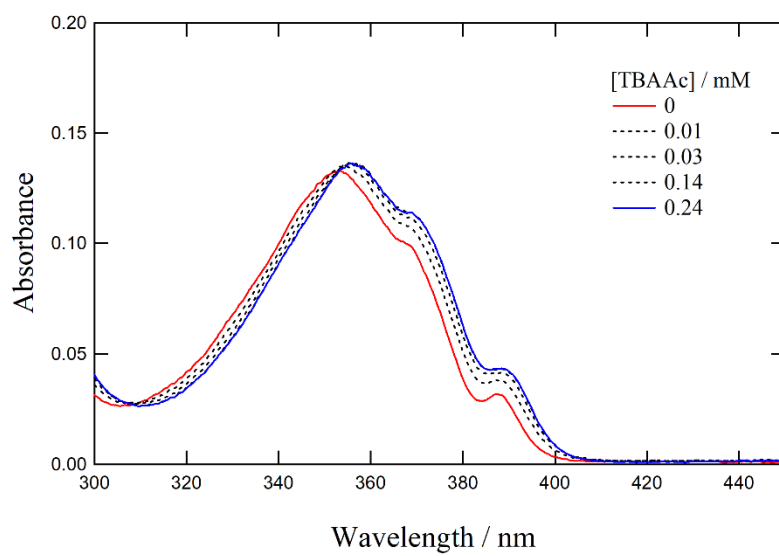

Fig. S2. Absorption spectra of *m*-CF<sub>3</sub>-1PUP in various concentrations of TBAAc in DMF.

### 3. Fluorescence spectra of *m*-CF<sub>3</sub>-1PUP in DMF in the presence of TBAAc

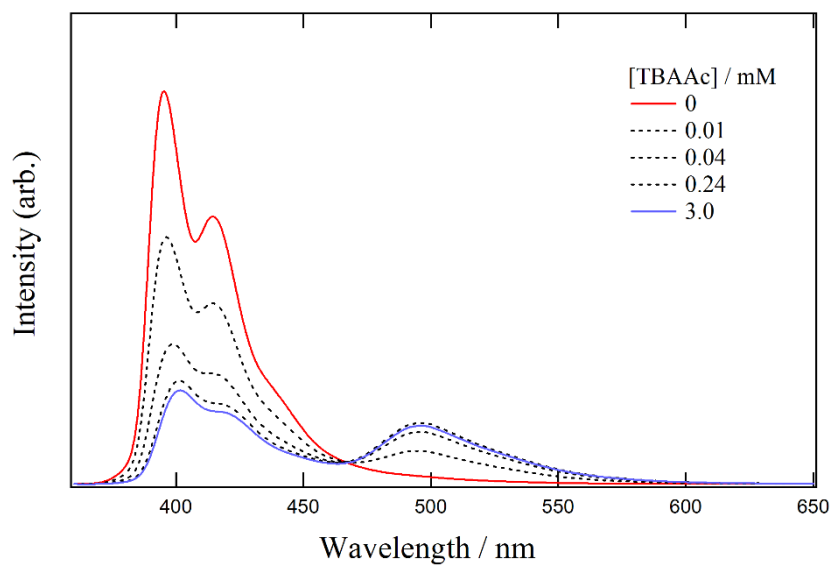

Fig. S3. Fluorescence spectra of *m*-CF<sub>3</sub>-1PUP in various concentrations of TBAAc in DMF.

#### 4. Fluorescence spectra of *m*-CF<sub>3</sub>-1PUP in DMF in the presence of hydroxy compounds without TBAAc

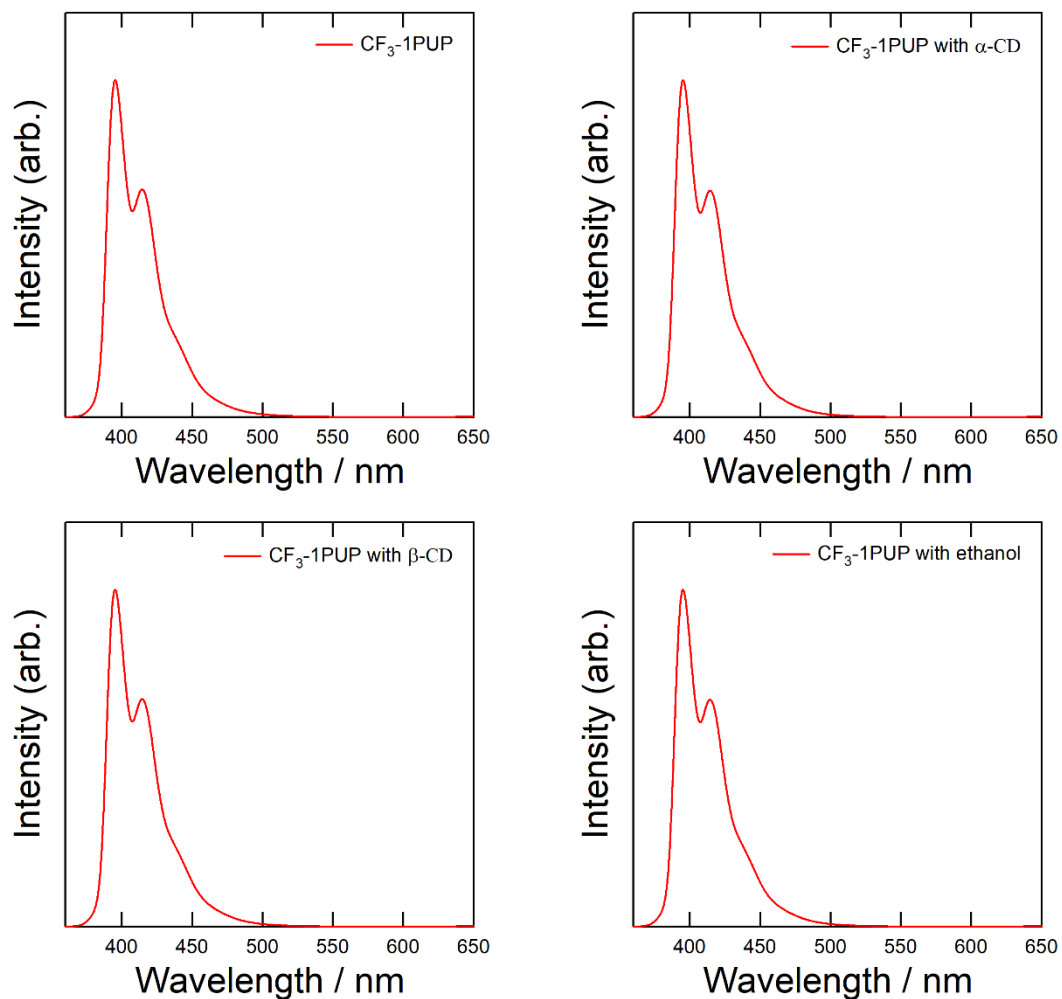

Fig. S4-1. Fluorescence spectra of *m*-CF<sub>3</sub>-1PUP in DMF in the presence of  $\alpha$ -CD,  $\beta$ -CD and ethanol without TBAAc.

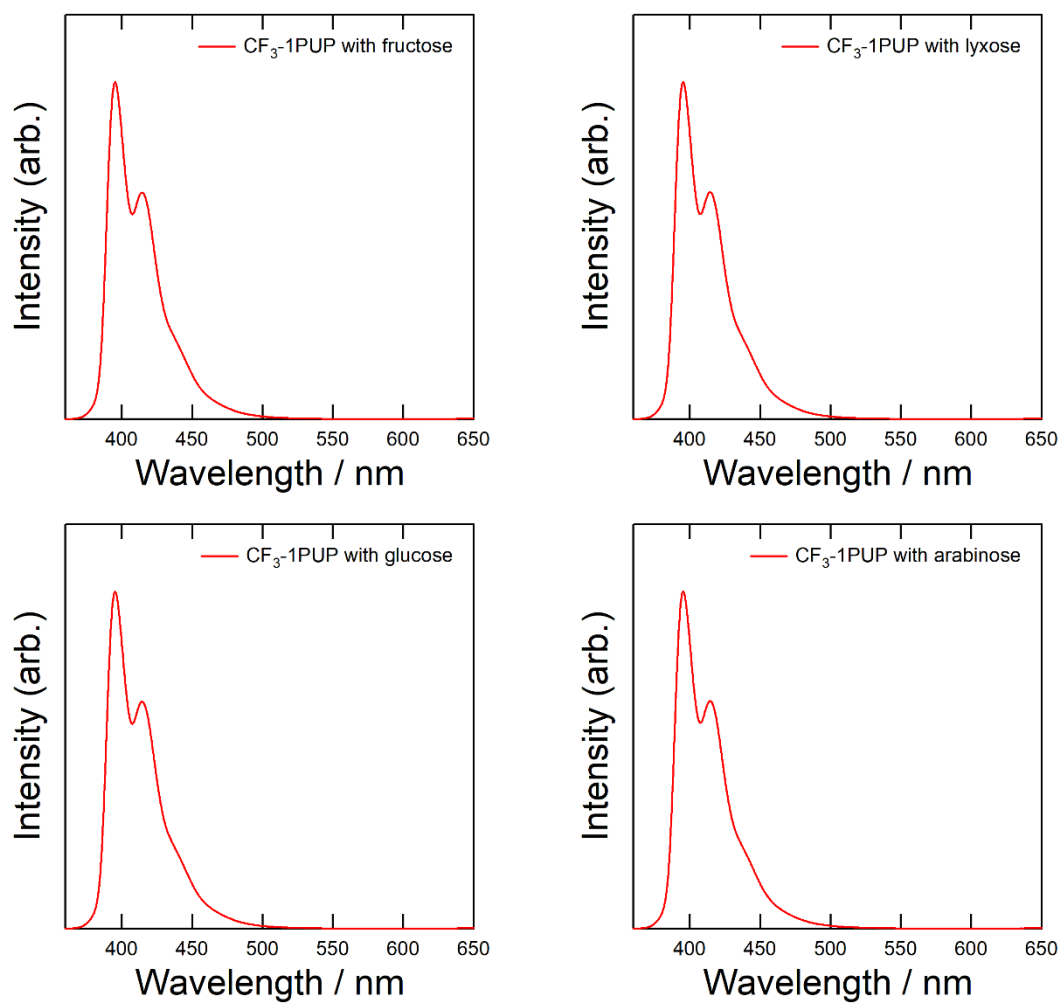

Fig. S4-2. Fluorescence spectra of  $m$ -CF<sub>3</sub>-1PUP in DMF in the presence of fructose, glucose, lyxose and arabinose without TBAAc.

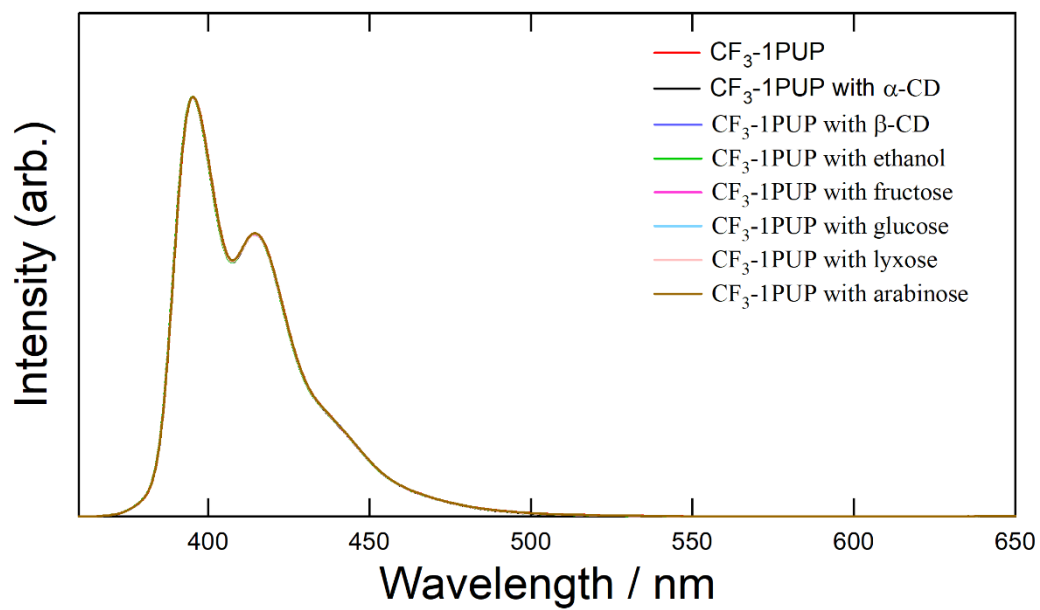

Fig. S4-3. Fluorescence spectra of *m*-CF<sub>3</sub>-1PUP in DMF in the presence of all hydroxy compounds without TBAAc.

## 5. Fluorescence decay curves of *m*-CF<sub>3</sub>-1PUP in DMF in the presence of TBAAc

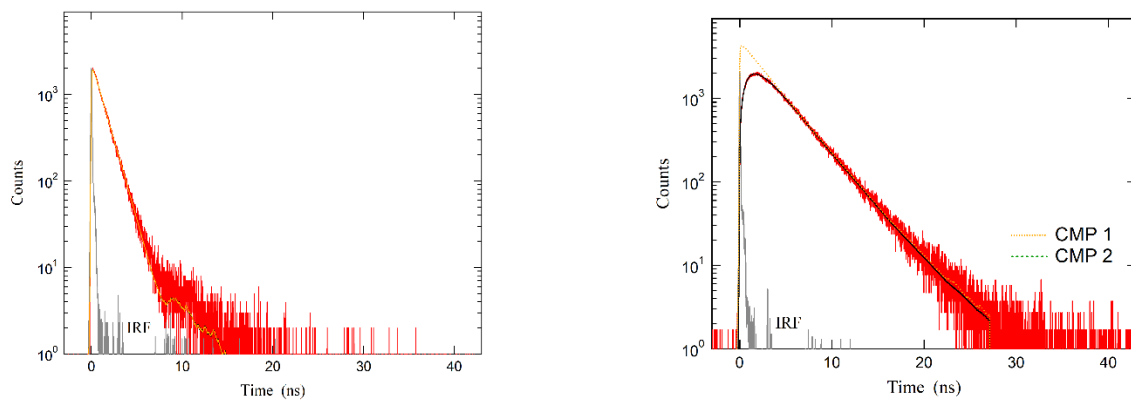

Fig. S5. Fluorescence decay curves of *m*-CF<sub>3</sub>-1PUP observed at 410 nm (left) and 520 nm (right) excited at 375 nm in the presence of 10 mM TBAAc in DMF under Ar.



## 6. Fluorescence lifetimes of *m*-CF<sub>3</sub>-1PUP in DMF in the presence of TBAAc

Table S1. Fluorescence lifetimes of *m*-CF<sub>3</sub>-1PUP with TBAAc in DMF under Ar

| $\lambda_{\text{obs}}$ | $\tau$ / ns               |
|------------------------|---------------------------|
| 410                    | 1.16 (1.00)               |
| 520                    | 1.19 (-1.00), 3.00 (1.00) |

## 7. Absorption spectra of *m*-CF<sub>3</sub>-1PUP in DMF in the presence of hydroxy compounds

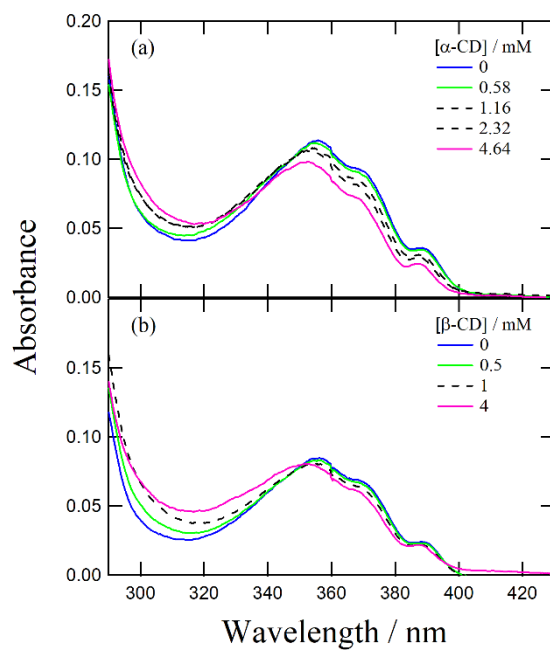

Fig. S6-1. Absorption spectra of *m*-CF<sub>3</sub>-1PUP in the presence of 9 mM TBAAc in various concentrations of (a)  $\alpha$ -CD and (b)  $\beta$ -CD in DMF.

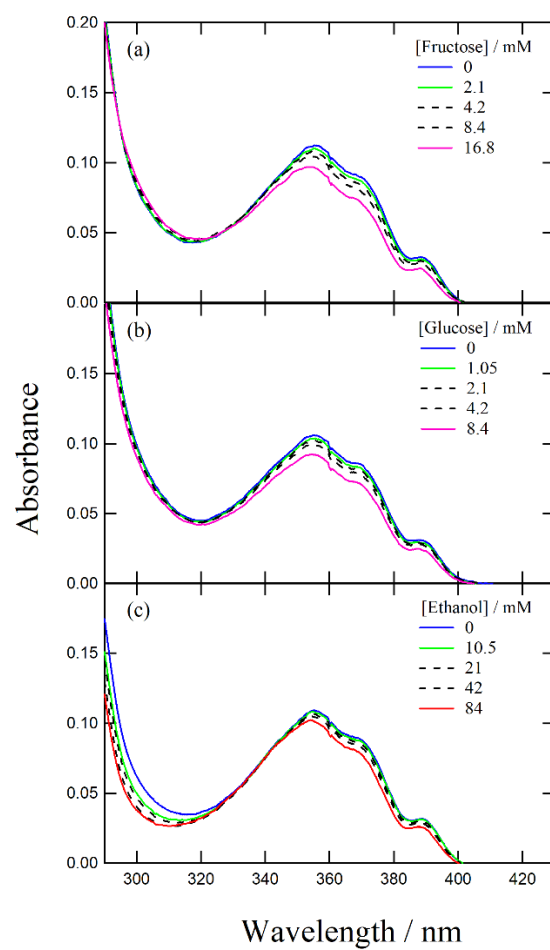

Fig. S6-2. Absorption spectra of *m*-CF<sub>3</sub>-1PUP in the presence of 9 mM TBAAc in various concentrations of (a) fructose, (b) glucose and (c) ethanol in DMF.

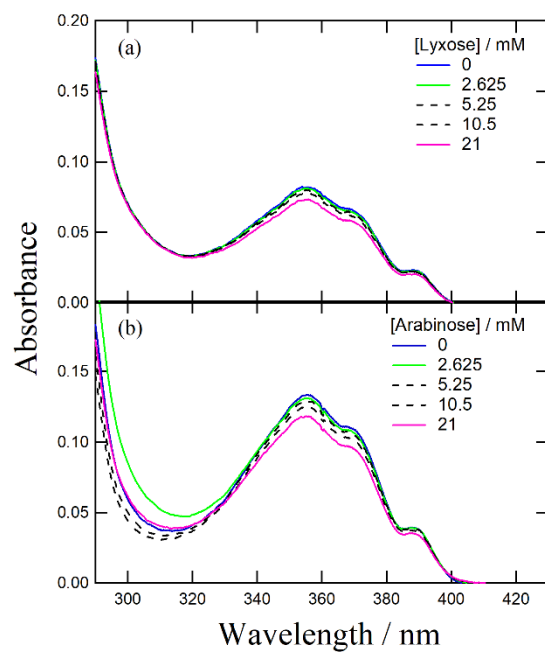

Fig. S6-3. Absorption spectra of *m*-CF<sub>3</sub>-1PUP in the presence of 9 mM TBAAc in various concentrations of (a) lyxose and (b) arabinose in DMF.

## 8. Fluorescence lifetimes of *m*-CF<sub>3</sub>-1PUP in DMF in the presence of hydroxy compounds

Table S2-1. Fluorescence lifetimes of *m*-CF<sub>3</sub>-1PUP–TBAAc with different concentrations of  $\alpha$ -CD and  $\beta$ -CD in DMF under Ar

| Concentration | $\lambda_{\text{obs}}$ | $\tau$ / ns               |
|---------------|------------------------|---------------------------|
| $\alpha$ -CD  |                        |                           |
| 0.58 mM       | 410                    | 1.04 (0.94), 4.96 (0.06)  |
|               | 520                    | 0.97 (–1.00), 3.11 (1.00) |
| 1.16 mM       | 410                    | 1.01 (0.93), 4.44 (0.07)  |
|               | 520                    | 0.98 (–1.00), 3.12 (1.00) |
| 2.32 mM       | 410                    | 1.04 (0.91), 5.00 (0.09)  |
|               | 520                    | 0.96 (–1.00), 3.19 (1.00) |
| 4.64 mM       | 410                    | 1.08 (0.85), 4.84 (0.15)  |
|               | 520                    | 0.99 (–1.00), 3.17 (1.00) |
| $\beta$ -CD   |                        |                           |
| 0.5 mM        | 410                    | 1.21 (0.96), 5.14 (0.04)  |
|               | 520                    | 1.18 (–1.00), 3.26 (1.00) |
| 1.0 mM        | 410                    | 1.20 (0.88), 5.31 (0.12)  |
|               | 520                    | 1.16 (–1.00), 3.15 (1.00) |
| 2.0 mM        | 410                    | 1.26 (0.69), 5.82 (0.31)  |
|               | 520                    | 1.14 (–1.00), 3.31 (1.00) |
| 4.0 mM        | 410                    | 1.36 (0.46), 6.18 (0.54)  |
|               | 520                    | 1.09 (–1.00), 3.57 (1.00) |

Table S2-2. Fluorescence lifetimes of *m*-CF<sub>3</sub>-1PUP–TBAAc with different concentrations of fructose and glucose in DMF under Ar

| Concentration   | $\lambda_{\text{obs}}$ | $\tau$ / ns               |
|-----------------|------------------------|---------------------------|
| <b>Fructose</b> |                        |                           |
| 2.1 mM          | 410                    | 1.21 (0.95), 5.28 (0.05)  |
|                 | 520                    | 1.17 (–1.00), 3.30 (1.00) |
| 4.2 mM          | 410                    | 1.20 (0.91), 5.75 (0.09)  |
|                 | 520                    | 1.20 (–1.00), 3.31 (1.00) |
| 8.4 mM          | 410                    | 1.25 (0.84), 5.46 (0.16)  |
|                 | 520                    | 1.20 (–1.00), 3.25 (1.00) |
| 16.8 mM         | 410                    | 1.24 (0.71), 5.36 (0.29)  |
|                 | 520                    | 1.17 (–1.00), 3.15 (1.00) |
| <b>Glucose</b>  |                        |                           |
| 1.05 mM         | 410                    | 1.18 (0.98), 4.85 (0.02)  |
|                 | 520                    | 1.18 (–1.00), 3.26 (1.00) |
| 2.1 mM          | 410                    | 1.25 (0.96), 5.34 (0.04)  |
|                 | 520                    | 1.22 (–1.00), 3.36 (1.00) |
| 4.2 mM          | 410                    | 1.19 (0.92), 5.67 (0.08)  |
|                 | 520                    | 1.19 (–1.00), 3.35 (1.00) |
| 8.4 mM          | 410                    | 1.13 (0.86), 5.91 (0.14)  |
|                 | 520                    | 1.21 (–1.00), 3.37 (1.00) |

Table S2-3. Fluorescence lifetimes of *m*-CF<sub>3</sub>-1PUP-TBAAc with different concentrations of ethanol in DMF under Ar

| Ethanol |     |                           |
|---------|-----|---------------------------|
| 10.5 mM | 410 | 1.14 (0.97), 4.67 (0.03)  |
|         | 520 | 1.19 (-1.00), 3.20 (1.00) |
| 21 mM   | 410 | 1.19 (0.96), 4.86 (0.04)  |
|         | 520 | 1.21 (-1.00), 3.24 (1.00) |
| 42 mM   | 410 | 1.28 (0.92), 5.22 (0.08)  |
|         | 520 | 1.30 (-1.00), 3.31 (1.00) |
| 84 mM   | 410 | 1.47 (0.85), 5.78 (0.15)  |
|         | 520 | 1.45 (-1.00), 3.32 (1.00) |

Table S2-4. Fluorescence lifetimes of *m*-CF<sub>3</sub>-1PUP–TBAAc with different concentrations of lyxose and arabinose in DMF under Ar

| Lyxose    |     |                           |
|-----------|-----|---------------------------|
| 2.625 mM  | 410 | 1.14 (0.99), 4.75 (0.01)  |
|           | 520 | 1.20 (–1.00), 3.23 (1.00) |
| 5.25 mM   | 410 | 1.17 (0.99), 5.31 (0.01)  |
|           | 520 | 1.19 (–1.00), 3.23 (1.00) |
| 10.5 mM   | 410 | 1.16 (0.98), 5.50 (0.02)  |
|           | 520 | 1.20 (–1.00), 3.20 (1.00) |
| 21 mM     | 410 | 1.17 (0.97), 5.79 (0.03)  |
|           | 520 | 1.17 (–1.00), 3.36 (1.00) |
| Arabinose |     |                           |
| 2.625 mM  | 410 | 1.14 (0.99), 3.76 (0.01)  |
|           | 520 | 1.17 (–1.00), 3.06 (1.00) |
| 5.25 mM   | 410 | 1.19 (0.98), 4.66 (0.02)  |
|           | 520 | 1.21 (–1.00), 3.30 (1.00) |
| 10.5 mM   | 410 | 1.19 (0.98), 4.95 (0.02)  |
|           | 520 | 1.21 (–1.00), 3.34 (1.00) |
| 21 mM     | 410 | 1.18 (0.96), 5.12 (0.04)  |
|           | 520 | 1.18 (–1.00), 3.23 (1.00) |



## 9. References

1. L. Huang, M. Yoshida and Y. Nishimura, *Journal of Molecular Liquids*, 2024, **398**, 124268.
